# Supplementary material for: Exposure to Ambient Fine Particulate Air Pollution in Utero as a Risk Factor for Child Stunting in Bangladesh
Source: MDPI journal article supplement (doi:10.3390/ijerph15010022), 2017-12-23
Supplement: s1 [file s1]

## Supplementary Materials

**Table S1.** Summary statistics for risk factors by child health outcomes: stunting, wasting, underweight, and small birth size.

| Variable, Outcome                                          | Stunting      | Wasting       | Underweight   | Small Birth Size |
|------------------------------------------------------------|---------------|---------------|---------------|------------------|
| <i>PM<sub>2.5</sub> exposure in utero</i>                  |               |               |               |                  |
| 19.6–40.2 µg/m <sup>3</sup>                                | 5705 (24.60)  | 5706 (24.61)  | 5705 (24.60)  | 2233 (18.81)     |
| 40.3–45.8 µg/m <sup>3</sup>                                | 5884 (25.38)  | 5884 (25.38)  | 5884 (25.38)  | 2863 (24.12)     |
| 45.9–51.9 µg/m <sup>3</sup>                                | 5741 (24.76)  | 5741 (24.76)  | 5741 (24.76)  | 3074 (25.90)     |
| 52.0–72.9 µg/m <sup>3</sup>                                | 5857 (25.26)  | 5857 (25.26)  | 5857 (25.26)  | 3700 (31.17)     |
| Age of child (months)                                      | 30.22 (17.02) | 30.22 (17.02) | 30.22 (17.02) | -                |
| <i>Type of birth</i>                                       |               |               |               |                  |
| Singleton                                                  | 22935 (98.91) | 22936 (98.91) | 22935 (98.91) | 11700 (98.57)    |
| Twin or triplet                                            | 252 (1.09)    | 252 (1.09)    | 252 (1.09)    | 170 (1.43)       |
| <i>Sex of child</i>                                        |               |               |               |                  |
| Male                                                       | 11848 (51.10) | 11849 (51.1)  | 11848 (51.1)  | 6119 (51.55)     |
| Female                                                     | 11339 (48.90) | 11339 (48.9)  | 11339 (48.9)  | 5751 (48.45)     |
| <i>Birth order of child</i>                                |               |               |               |                  |
| Second or higher                                           | 15783 (68.07) | 15783 (68.07) | 15783 (68.07) | 7706 (64.92)     |
| First                                                      | 7404 (31.93)  | 7405 (31.93)  | 7404 (31.93)  | 4164 (35.08)     |
| <i>Short birth interval</i>                                |               |               |               |                  |
| No                                                         | 21125 (91.11) | 21126 (91.11) | 21125 (91.11) | 10986 (92.55)    |
| Yes, < 12 months                                           | 113 (0.49)    | 113 (0.49)    | 113 (0.49)    | 53 (0.45)        |
| Yes, 12–23 months                                          | 1949 (8.41)   | 1949 (8.41)   | 1949 (8.41)   | 831 (7.00)       |
| <i>Had diarrhea in last two weeks</i>                      |               |               |               |                  |
| No                                                         | 21666 (93.44) | 21667 (93.44) | 21666 (93.44) | -                |
| Yes                                                        | 1521 (6.56)   | 1521 (6.56)   | 1521 (6.56)   | -                |
| <i>Maternal height &lt; 160 cm</i>                         |               |               |               |                  |
| No                                                         | 1000 (4.31)   | 1000 (4.31)   | 1000 (4.31)   | 557 (4.69)       |
| Yes                                                        | 22187 (95.69) | 22188 (95.69) | 22187 (95.69) | 11313 (95.31)    |
| <i>Maternal body mass index &lt; 18.5 kg/m<sup>2</sup></i> |               |               |               |                  |
| No                                                         | 16370 (70.60) | 16370 (70.60) | 16370 (70.60) | 8696 (73.26)     |
| Yes                                                        | 6817 (29.40)  | 6818 (29.40)  | 6817 (29.40)  | 3174 (26.74)     |
| <i>Teenage motherhood</i>                                  |               |               |               |                  |
| No                                                         | 16279 (70.21) | 16279 (70.20) | 16279 (70.21) | 8307 (69.98)     |
| Yes, < 18 years                                            | 3606 (15.55)  | 3607 (15.56)  | 3606 (15.55)  | 1824 (15.37)     |
| Yes, 18–19 years                                           | 3302 (14.24)  | 3302 (14.24)  | 3302 (14.24)  | 1739 (14.65)     |
| <i>Education level of mother</i>                           |               |               |               |                  |
| None or incomplete primary                                 | 5718 (24.66)  | 5718 (24.66)  | 5718 (24.66)  | 2181 (18.37)     |
| Completed primary                                          | 7052 (30.41)  | 7052 (30.41)  | 7052 (30.41)  | 3572 (30.09)     |
| Completed secondary                                        | 8601 (37.09)  | 8602 (37.10)  | 8601 (37.09)  | 5109 (43.04)     |
| Completed tertiary                                         | 1816 (7.83)   | 1816 (7.83)   | 1816 (7.83)   | 1008 (8.49)      |
| <i>Education level of mother's partner</i>                 |               |               |               |                  |
| None or incomplete primary                                 | 7326 (31.60)  | 7326 (31.59)  | 7326 (31.60)  | 3266 (27.51)     |
| Completed primary                                          | 6763 (29.17)  | 6764 (29.17)  | 6763 (29.17)  | 3562 (30.01)     |
| Completed secondary                                        | 6226 (26.85)  | 6226 (26.85)  | 6226 (26.85)  | 3461 (29.16)     |
| Completed tertiary                                         | 2872 (12.39)  | 2872 (12.39)  | 2872 (12.39)  | 1581 (13.32)     |

| <b>Variable, Outcome</b>                        | <b>Stunting</b> | <b>Wasting</b> | <b>Underweight</b> | <b>Small Birth Size</b> |
|-------------------------------------------------|-----------------|----------------|--------------------|-------------------------|
| <i>Improved water source in household</i>       |                 |                |                    |                         |
| No                                              | 702 (3.03)      | 702 (3.03)     | 702 (3.03)         | 260 (2.19)              |
| Yes                                             | 22485 (96.97)   | 22486 (96.97)  | 22485 (96.97)      | 11610 (97.81)           |
| <i>Improved sanitation in household</i>         |                 |                |                    |                         |
| No                                              | 10289 (44.37)   | 10290 (44.38)  | 10289 (44.37)      | 5067 (42.69)            |
| Yes                                             | 12898 (55.63)   | 12898 (55.62)  | 12898 (55.63)      | 6803 (57.31)            |
| <i>Type of cooking fuel in household</i>        |                 |                |                    |                         |
| Other                                           | 2706 (11.67)    | 2706 (11.67)   | 2706 (11.67)       | 1542 (12.99)            |
| Solid fuel                                      | 20481 (88.33)   | 20482 (88.33)  | 20481 (88.33)      | 10328 (87.01)           |
| <i>Type of residence of household</i>           |                 |                |                    |                         |
| Rural                                           | 15854 (68.37)   | 15855 (68.38)  | 15854 (68.37)      | 8180 (68.91)            |
| Urban                                           | 7333 (31.63)    | 7333 (31.62)   | 7333 (31.63)       | 3690 (31.09)            |
| <i>Wealth quintile of household</i>             |                 |                |                    |                         |
| Poorest                                         | 5219 (22.51)    | 5220 (22.51)   | 5219 (22.51)       | 2685 (22.62)            |
| Poor                                            | 4532 (19.55)    | 4532 (19.54)   | 4532 (19.55)       | 2299 (19.37)            |
| Middle                                          | 4362 (18.81)    | 4362 (18.81)   | 4362 (18.81)       | 2225 (18.74)            |
| Rich                                            | 4368 (18.84)    | 4368 (18.84)   | 4368 (18.84)       | 2339 (19.71)            |
| Richest                                         | 4706 (20.30)    | 4706 (20.29)   | 4706 (20.30)       | 2322 (19.56)            |
| <i>Demographic and Health Survey (DHS) Wave</i> |                 |                |                    |                         |
| 2004                                            | 5285 (22.79)    | 5286 (22.80)   | 5285 (22.79)       | -                       |
| 2007                                            | 4711 (20.32)    | 4711 (20.32)   | 4711 (20.32)       | -                       |
| 2011                                            | 6856 (29.57)    | 6856 (29.57)   | 6856 (29.57)       | 7668 (64.60)            |
| 2014                                            | 6335 (27.32)    | 6335 (27.32)   | 6335 (27.32)       | 4202 (35.40)            |
| N                                               | 23,187          | 23,188         | 23,187             | 11,870                  |

Values are mean (standard deviation) for continuous variables and count (percent) for categorical variables.

**Table S2.** The adjusted relative risk [95% confidence interval] of in utero PM<sub>2.5</sub> exposure on child stunting.

| <b>Outcome: Stunting.</b>                                                                   | <b>(1)</b>                  | <b>(2)</b>                  | <b>(3)</b>                  | <b>(4)</b>                  |
|---------------------------------------------------------------------------------------------|-----------------------------|-----------------------------|-----------------------------|-----------------------------|
| PM <sub>2.5</sub> exposure in utero, 40.3–45.8<br>µg/m <sup>3</sup>                         | 1.074 **<br>[1.014, 1.138]  | 1.069 **<br>[1.005, 1.138]  | 1.041<br>[0.970, 1.118]     | 1.061<br>[0.983, 1.145]     |
| PM <sub>2.5</sub> exposure in utero, 45.9–51.9<br>µg/m <sup>3</sup>                         | 1.150 ***<br>[1.069, 1.237] | 1.129 ***<br>[1.045, 1.220] | 1.070<br>[0.984, 1.164]     | 1.106 **<br>[1.003, 1.220]  |
| PM <sub>2.5</sub> exposure in utero, 52.0–72.9<br>µg/m <sup>3</sup>                         | 1.132 ***<br>[1.031, 1.243] | 1.114 **<br>[1.009, 1.231]  | 1.030<br>[0.933, 1.137]     | 1.085<br>[0.956, 1.232]     |
| PM <sub>2.5</sub> exposure in utero, 40.3–45.8<br>µg/m <sup>3</sup> * Urban                 | -                           | 1.025<br>[0.916, 1.148]     | -                           | -                           |
| PM <sub>2.5</sub> exposure in utero, 45.9–51.9<br>µg/m <sup>3</sup> * Urban                 | -                           | 1.089<br>[0.959, 1.236]     | -                           | -                           |
| PM <sub>2.5</sub> exposure in utero, 52.0–72.9<br>µg/m <sup>3</sup> * Urban                 | -                           | 1.070<br>[0.939, 1.220]     | -                           | -                           |
| Geometric average PM <sub>2.5</sub> level in<br>district in birth year (µg/m <sup>3</sup> ) | -                           | -                           | -                           | 0.996<br>[0.990, 1.002]     |
| Age of child (months)                                                                       | 1.013 ***<br>[1.012, 1.014] | 1.013 ***<br>[1.012, 1.014] | 1.013 ***<br>[1.011, 1.014] | 1.012 ***<br>[1.011, 1.014] |
| Twin or triplet                                                                             | 1.616 ***<br>[1.425, 1.832] | 1.615 ***<br>[1.424, 1.831] | 1.610 ***<br>[1.353, 1.915] | 1.612 ***<br>[1.355, 1.918] |
| Female                                                                                      | 1.048 ***<br>[1.014, 1.083] | 1.048 ***<br>[1.014, 1.083] | 1.049 **<br>[1.005, 1.096]  | 1.049 **<br>[1.005, 1.096]  |
| First child                                                                                 | 0.968<br>[0.918, 1.020]     | 0.968<br>[0.918, 1.021]     | 0.968<br>[0.905, 1.035]     | 0.968<br>[0.905, 1.035]     |
| Birth interval < 12 months                                                                  | 1.114<br>[0.897, 1.385]     | 1.113<br>[0.896, 1.383]     | 1.115<br>[0.841, 1.478]     | 1.114<br>[0.841, 1.478]     |
| Birth interval 12–23 months                                                                 | 1.146 ***<br>[1.090, 1.205] | 1.146 ***<br>[1.090, 1.205] | 1.154 ***<br>[1.073, 1.240] | 1.152 ***<br>[1.072, 1.239] |
| Had diarrhea in last two weeks                                                              | 1.121 ***<br>[1.054, 1.192] | 1.121 ***<br>[1.054, 1.192] | 1.126 ***<br>[1.037, 1.223] | 1.126 ***<br>[1.037, 1.223] |
| Maternal height < 160 cm                                                                    | 2.114 ***<br>[1.818, 2.459] | 2.115 ***<br>[1.819, 2.459] | 2.124 ***<br>[1.807, 2.498] | 2.124 ***<br>[1.806, 2.497] |
| Maternal BMI < 18.5 kg/m <sup>2</sup>                                                       | 1.178 ***<br>[1.137, 1.220] | 1.178 ***<br>[1.137, 1.220] | 1.185 ***<br>[1.131, 1.242] | 1.185 ***<br>[1.131, 1.242] |
| Age of mother at birth < 18 years                                                           | 1.153 ***<br>[1.086, 1.224] | 1.153 ***<br>[1.086, 1.224] | 1.146 ***<br>[1.062, 1.237] | 1.146 ***<br>[1.062, 1.237] |
| Age of mother at birth 18–19 years                                                          | 1.040<br>[0.986, 1.095]     | 1.040<br>[0.987, 1.096]     | 1.038<br>[0.967, 1.114]     | 1.039<br>[0.968, 1.115]     |
| Mother completed primary school                                                             | 0.994<br>[0.953, 1.036]     | 0.993<br>[0.953, 1.036]     | 0.990<br>[0.936, 1.048]     | 0.990<br>[0.936, 1.048]     |
| Mother completed secondary school                                                           | 0.914 ***<br>[0.865, 0.965] | 0.913 ***<br>[0.864, 0.965] | 0.904 ***<br>[0.843, 0.969] | 0.904 ***<br>[0.843, 0.969] |
| Mother completed tertiary level                                                             | 0.703 ***<br>[0.607, 0.814] | 0.704 ***<br>[0.608, 0.815] | 0.693 ***<br>[0.593, 0.811] | 0.693 ***<br>[0.592, 0.811] |
| Partner completed primary school                                                            | 0.975<br>[0.936, 1.016]     | 0.975<br>[0.936, 1.016]     | 0.978<br>[0.926, 1.033]     | 0.977<br>[0.926, 1.032]     |
| Partner completed secondary school                                                          | 0.855 ***<br>[0.810, 0.903] | 0.855 ***<br>[0.809, 0.903] | 0.854 ***<br>[0.798, 0.914] | 0.854 ***<br>[0.798, 0.914] |
| Partner completed tertiary level                                                            | 0.687 ***<br>[0.618, 0.763] | 0.688 ***<br>[0.619, 0.764] | 0.687 ***<br>[0.610, 0.775] | 0.687 ***<br>[0.610, 0.775] |
| Improved water source in household                                                          | 0.955<br>[0.873, 1.043]     | 0.950<br>[0.869, 1.039]     | 0.944<br>[0.837, 1.065]     | 0.945<br>[0.837, 1.066]     |
| Improved sanitation in household                                                            | 0.958 **<br>[0.920, 0.997]  | 0.958 **<br>[0.920, 0.998]  | 0.954 *<br>[0.908, 1.003]   | 0.954 *<br>[0.908, 1.003]   |
| Cooking with solid fuel                                                                     | 1.043<br>[0.946, 1.150]     | 1.045<br>[0.949, 1.151]     | 1.009<br>[0.906, 1.123]     | 1.007<br>[0.904, 1.121]     |
| Urban residence                                                                             | 0.999<br>[0.914, 1.092]     | 1.041<br>[0.990, 1.095]     | 1.043<br>[0.985, 1.104]     | 1.042<br>[0.984, 1.103]     |

| <b>Outcome: Stunting.</b>      | <b>(1)</b>                  | <b>(2)</b>                  | <b>(3)</b>                  | <b>(4)</b>                  |
|--------------------------------|-----------------------------|-----------------------------|-----------------------------|-----------------------------|
| Wealth index quintile: poor    | 0.886 ***<br>[0.846, 0.928] | 0.886 ***<br>[0.846, 0.928] | 0.886 ***<br>[0.832, 0.942] | 0.885 ***<br>[0.832, 0.942] |
| Wealth index quintile: middle  | 0.847 ***<br>[0.804, 0.892] | 0.847 ***<br>[0.804, 0.892] | 0.848 ***<br>[0.792, 0.908] | 0.847 ***<br>[0.791, 0.907] |
| Wealth index quintile: rich    | 0.760 ***<br>[0.715, 0.809] | 0.761 ***<br>[0.715, 0.809] | 0.764 ***<br>[0.706, 0.827] | 0.764 ***<br>[0.706, 0.826] |
| Wealth index quintile: richest | 0.555 ***<br>[0.506, 0.609] | 0.555 ***<br>[0.506, 0.609] | 0.558 ***<br>[0.501, 0.622] | 0.558 ***<br>[0.501, 0.622] |
| Survey fixed effect: 2007 wave | 0.821 ***<br>[0.777, 0.868] | 0.821 ***<br>[0.777, 0.868] | 0.839 ***<br>[0.785, 0.898] | 0.844 ***<br>[0.789, 0.903] |
| Survey fixed effect: 2011 wave | 0.835 ***<br>[0.791, 0.882] | 0.835 ***<br>[0.791, 0.882] | 0.854 ***<br>[0.802, 0.909] | 0.861 ***<br>[0.807, 0.917] |
| Survey fixed effect: 2014 wave | 0.757 ***<br>[0.712, 0.805] | 0.757 ***<br>[0.712, 0.805] | 0.781 ***<br>[0.728, 0.837] | 0.790 ***<br>[0.735, 0.848] |
| Specification                  | District fixed effects      | District fixed effects      | District random effects     | District random effects     |
| N                              | 23,187                      | 23,187                      | 23,187                      | 23,187                      |

Values are estimated coefficient [95% confidence interval]. \*  $p < 0.10$ , \*\*  $p < 0.05$ , \*\*\*  $p < 0.01$ .

**Table S3.** The adjusted relative risk [95% confidence interval] of in utero PM<sub>2.5</sub> exposure on child wasting.

| <b>Outcome: Wasting</b>                                                                  | <b>(1)</b>                  | <b>(2)</b>                  | <b>(3)</b>                  | <b>(4)</b>                  |
|------------------------------------------------------------------------------------------|-----------------------------|-----------------------------|-----------------------------|-----------------------------|
| PM <sub>2.5</sub> exposure in utero, 40.3–45.8 µg/m <sup>3</sup>                         | 1.109 *<br>[0.990, 1.243]   | 1.123 *<br>[0.987, 1.277]   | 1.004<br>[0.901, 1.119]     | 1.053<br>[0.933, 1.189]     |
| PM <sub>2.5</sub> exposure in utero, 45.9–51.9 µg/m <sup>3</sup>                         | 1.247 ***<br>[1.082, 1.437] | 1.188 **<br>[1.023, 1.379]  | 1.086<br>[0.969, 1.216]     | 1.185 **<br>[1.020, 1.377]  |
| PM <sub>2.5</sub> exposure in utero, 52.0–72.9 µg/m <sup>3</sup>                         | 1.272 ***<br>[1.069, 1.512] | 1.258 **<br>[1.051, 1.507]  | 1.049<br>[0.929, 1.186]     | 1.199 *<br>[0.988, 1.456]   |
| PM <sub>2.5</sub> exposure in utero, 40.3–45.8 µg/m <sup>3</sup> * Urban                 | -                           | 0.980<br>[0.797, 1.206]     | -                           | -                           |
| PM <sub>2.5</sub> exposure in utero, 45.9–51.9 µg/m <sup>3</sup> * Urban                 | -                           | 1.256**<br>[1.016, 1.554]   | -                           | -                           |
| PM <sub>2.5</sub> exposure in utero, 52.0–72.9 µg/m <sup>3</sup> * Urban                 | -                           | 1.066<br>[0.848, 1.339]     | -                           | -                           |
| Geometric average PM <sub>2.5</sub> level in district in birth year (µg/m <sup>3</sup> ) | -                           | -                           | -                           | 0.992 *<br>[0.984, 1.001]   |
| Age of child (months)                                                                    | 1.002 *<br>[1.000, 1.004]   | 1.002 *<br>[1.000, 1.004]   | 1.001<br>[0.999, 1.003]     | 1.001<br>[0.999, 1.003]     |
| Twin or triplet                                                                          | 0.957<br>[0.659, 1.390]     | 0.958<br>[0.660, 1.392]     | 0.950<br>[0.670, 1.348]     | 0.953<br>[0.672, 1.351]     |
| Female                                                                                   | 1.017<br>[0.955, 1.083]     | 1.017<br>[0.955, 1.083]     | 1.019<br>[0.951, 1.091]     | 1.019<br>[0.951, 1.091]     |
| First child                                                                              | 0.895 **<br>[0.812, 0.986]  | 0.895 **<br>[0.812, 0.986]  | 0.897 **<br>[0.808, 0.995]  | 0.896 **<br>[0.807, 0.994]  |
| Birth interval < 12 months                                                               | 0.779<br>[0.460, 1.320]     | 0.780<br>[0.460, 1.321]     | 0.779<br>[0.451, 1.344]     | 0.777<br>[0.450, 1.341]     |
| Birth interval 12–23 months                                                              | 0.921<br>[0.819, 1.036]     | 0.921<br>[0.819, 1.035]     | 0.918<br>[0.807, 1.044]     | 0.915<br>[0.804, 1.040]     |
| Had diarrhea in last two weeks                                                           | 1.397 ***<br>[1.251, 1.559] | 1.398 ***<br>[1.253, 1.561] | 1.406 ***<br>[1.247, 1.584] | 1.405 ***<br>[1.247, 1.583] |
| Maternal height < 160 cm                                                                 | 1.105<br>[0.925, 1.319]     | 1.107<br>[0.927, 1.322]     | 1.106<br>[0.924, 1.323]     | 1.106<br>[0.924, 1.323]     |
| Maternal body mass index < 18.5 kg/m <sup>2</sup>                                        | 1.608 ***<br>[1.501, 1.723] | 1.607 ***<br>[1.500, 1.721] | 1.610 ***<br>[1.497, 1.732] | 1.609 ***<br>[1.496, 1.731] |
| Age of mother at birth < 18 years                                                        | 1.122 **<br>[1.004, 1.254]  | 1.121 **<br>[1.002, 1.253]  | 1.129 *<br>[1.000, 1.275]   | 1.132 **<br>[1.003, 1.279]  |
| Age of mother at birth 18–19 years                                                       | 1.036<br>[0.932, 1.151]     | 1.036<br>[0.932, 1.151]     | 1.038<br>[0.927, 1.162]     | 1.040<br>[0.929, 1.164]     |
| Mother completed primary school                                                          | 1.041<br>[0.954, 1.136]     | 1.042<br>[0.955, 1.137]     | 1.043<br>[0.949, 1.146]     | 1.045<br>[0.951, 1.148]     |
| Mother completed secondary school                                                        | 0.922<br>[0.830, 1.024]     | 0.923<br>[0.831, 1.025]     | 0.928<br>[0.830, 1.037]     | 0.930<br>[0.832, 1.039]     |
| Mother completed tertiary level                                                          | 0.859<br>[0.704, 1.048]     | 0.857<br>[0.702, 1.047]     | 0.861<br>[0.699, 1.061]     | 0.863<br>[0.700, 1.063]     |
| Partner completed primary school                                                         | 1.045<br>[0.963, 1.134]     | 1.045<br>[0.963, 1.134]     | 1.042<br>[0.952, 1.140]     | 1.041<br>[0.951, 1.139]     |
| Partner completed secondary school                                                       | 1.062<br>[0.967, 1.166]     | 1.062<br>[0.968, 1.166]     | 1.061<br>[0.954, 1.180]     | 1.060<br>[0.954, 1.179]     |
| Partner completed tertiary level                                                         | 1.001<br>[0.857, 1.171]     | 0.998<br>[0.854, 1.167]     | 1.000<br>[0.846, 1.182]     | 1.000<br>[0.846, 1.182]     |
| Improved water source in household                                                       | 0.965<br>[0.812, 1.147]     | 0.975<br>[0.820, 1.160]     | 0.920<br>[0.758, 1.116]     | 0.922<br>[0.760, 1.119]     |
| Improved sanitation in household                                                         | 1.001<br>[0.930, 1.076]     | 0.999<br>[0.928, 1.075]     | 1.004<br>[0.927, 1.087]     | 1.006<br>[0.929, 1.089]     |
| Cooking with solid fuel                                                                  | 0.948<br>[0.811, 1.107]     | 0.940<br>[0.804, 1.099]     | 0.967<br>[0.829, 1.128]     | 0.963<br>[0.826, 1.124]     |
| Urban residence                                                                          | 0.934<br>[0.855, 1.020]     | 0.869*<br>[0.741, 1.020]    | 0.943<br>[0.861, 1.033]     | 0.941<br>[0.859, 1.030]     |

| <b>Outcome: Wasting</b>        | <b>(1)</b>                  | <b>(2)</b>                  | <b>(3)</b>                  | <b>(4)</b>                  |
|--------------------------------|-----------------------------|-----------------------------|-----------------------------|-----------------------------|
| Wealth index quintile: poor    | 0.978<br>[0.891, 1.073]     | 0.979<br>[0.892, 1.075]     | 0.984<br>[0.890, 1.090]     | 0.984<br>[0.889, 1.089]     |
| Wealth index quintile: middle  | 0.886 **<br>[0.799, 0.982]  | 0.887 **<br>[0.800, 0.983]  | 0.908 *<br>[0.813, 1.014]   | 0.906 *<br>[0.811, 1.012]   |
| Wealth index quintile: rich    | 0.811 ***<br>[0.718, 0.916] | 0.810 ***<br>[0.717, 0.915] | 0.831 ***<br>[0.733, 0.942] | 0.830 ***<br>[0.732, 0.941] |
| Wealth index quintile: richest | 0.789 ***<br>[0.675, 0.923] | 0.790 ***<br>[0.675, 0.924] | 0.813 **<br>[0.693, 0.954]  | 0.813 **<br>[0.693, 0.953]  |
| Survey fixed effect: 2007 wave | 1.220 ***<br>[1.096, 1.357] | 1.220 ***<br>[1.097, 1.358] | 1.255 ***<br>[1.128, 1.397] | 1.257 ***<br>[1.130, 1.399] |
| Survey fixed effect: 2011 wave | 1.180 ***<br>[1.060, 1.313] | 1.181 ***<br>[1.061, 1.314] | 1.223 ***<br>[1.104, 1.355] | 1.229 ***<br>[1.110, 1.361] |
| Survey fixed effect: 2014 wave | 1.076<br>[0.960, 1.207]     | 1.075<br>[0.959, 1.206]     | 1.130 **<br>[1.013, 1.261]  | 1.142 **<br>[1.023, 1.274]  |
| Specification                  | District fixed effects      | District fixed effects      | District random effects     | District random effects     |
| N                              | 23,188                      | 23,188                      | 23,188                      | 23,188                      |

Values are estimated coefficient [95% confidence interval]. \*  $p < 0.10$ , \*\*  $p < 0.05$ , \*\*\*  $p < 0.01$ .

**Table S4.** The adjusted relative risk [95% confidence interval] of in utero PM<sub>2.5</sub> exposure on child underweight.

| <b>Outcome: Underweight</b>                                                                 | <b>(1)</b>                  | <b>(2)</b>                  | <b>(3)</b>                  | <b>(4)</b>                  |
|---------------------------------------------------------------------------------------------|-----------------------------|-----------------------------|-----------------------------|-----------------------------|
| PM <sub>2.5</sub> exposure in utero, 40.3–45.8 µg/m <sup>3</sup>                            | 1.118 ***<br>[1.063, 1.176] | 1.117 ***<br>[1.057, 1.180] | 1.050<br>[0.986, 1.118]     | 1.059<br>[0.988, 1.134]     |
| PM <sub>2.5</sub> exposure in utero, 45.9–51.9 µg/m <sup>3</sup>                            | 1.156 ***<br>[1.087, 1.231] | 1.138 ***<br>[1.067, 1.215] | 1.044<br>[0.972, 1.120]     | 1.059<br>[0.970, 1.156]     |
| PM <sub>2.5</sub> exposure in utero, 52.0–72.9 µg/m <sup>3</sup>                            | 1.127 ***<br>[1.041, 1.220] | 1.108 **<br>[1.019, 1.205]  | 0.995<br>[0.920, 1.076]     | 1.018<br>[0.910, 1.139]     |
| PM <sub>2.5</sub> exposure in utero, 40.3–45.8 µg/m <sup>3</sup> *<br>Urban                 | -                           | 1.015<br>[0.922, 1.116]     | -                           | -                           |
| PM <sub>2.5</sub> exposure in utero, 45.9–51.9 µg/m <sup>3</sup> *<br>Urban                 | -                           | 1.075<br>[0.970, 1.193]     | -                           | -                           |
| PM <sub>2.5</sub> exposure in utero, 52.0–72.9 µg/m <sup>3</sup> *<br>Urban                 | -                           | 1.075<br>[0.965, 1.197]     | -                           | -                           |
| Geometric average PM <sub>2.5</sub> level in district in<br>birth year (µg/m <sup>3</sup> ) | -                           | -                           | -                           | 0.999<br>[0.993, 1.004]     |
| Age of child (months)                                                                       | 1.011 ***<br>[1.010, 1.012] | 1.011 ***<br>[1.010, 1.012] | 1.010 ***<br>[1.009, 1.012] | 1.010 ***<br>[1.009, 1.012] |
| Twin or triplet                                                                             | 1.500 ***<br>[1.339, 1.679] | 1.500 ***<br>[1.340, 1.679] | 1.502 ***<br>[1.278, 1.765] | 1.503 ***<br>[1.279, 1.766] |
| Female                                                                                      | 1.092 ***<br>[1.062, 1.123] | 1.092 ***<br>[1.062, 1.123] | 1.094 ***<br>[1.052, 1.137] | 1.093 ***<br>[1.052, 1.137] |
| First child                                                                                 | 0.966<br>[0.925, 1.009]     | 0.966<br>[0.925, 1.009]     | 0.967<br>[0.911, 1.027]     | 0.967<br>[0.911, 1.027]     |
| Birth interval < 12 months                                                                  | 0.957<br>[0.775, 1.182]     | 0.958<br>[0.776, 1.184]     | 0.952<br>[0.720, 1.258]     | 0.951<br>[0.720, 1.257]     |
| Birth interval 12–23 months                                                                 | 1.097 ***<br>[1.048, 1.148] | 1.097 ***<br>[1.048, 1.147] | 1.103 ***<br>[1.031, 1.179] | 1.102 ***<br>[1.030, 1.179] |
| Had diarrhea in last two weeks                                                              | 1.180 ***<br>[1.122, 1.242] | 1.180 ***<br>[1.122, 1.242] | 1.186 ***<br>[1.102, 1.276] | 1.186 ***<br>[1.102, 1.276] |
| Maternal height < 160 cm                                                                    | 1.605 ***<br>[1.446, 1.782] | 1.605 ***<br>[1.446, 1.782] | 1.615 ***<br>[1.425, 1.830] | 1.615 ***<br>[1.425, 1.830] |
| Maternal body mass index < 18.5 kg/m <sup>2</sup>                                           | 1.325 ***<br>[1.286, 1.365] | 1.325 ***<br>[1.286, 1.365] | 1.335 ***<br>[1.280, 1.392] | 1.335 ***<br>[1.280, 1.392] |
| Age of mother at birth < 18 years                                                           | 1.110 ***<br>[1.057, 1.165] | 1.109 ***<br>[1.056, 1.165] | 1.104 ***<br>[1.030, 1.182] | 1.104 ***<br>[1.031, 1.183] |
| Age of mother at birth 18–19 years                                                          | 1.020<br>[0.973, 1.069]     | 1.020<br>[0.973, 1.068]     | 1.018<br>[0.955, 1.085]     | 1.018<br>[0.955, 1.085]     |
| Mother completed primary school                                                             | 1.002<br>[0.966, 1.040]     | 1.003<br>[0.966, 1.040]     | 0.997<br>[0.947, 1.050]     | 0.997<br>[0.947, 1.050]     |
| Mother completed secondary school                                                           | 0.927 ***<br>[0.885, 0.970] | 0.927 ***<br>[0.885, 0.970] | 0.917 ***<br>[0.862, 0.977] | 0.918 ***<br>[0.862, 0.977] |
| Mother completed tertiary level                                                             | 0.745 ***<br>[0.666, 0.833] | 0.744 ***<br>[0.665, 0.832] | 0.730 ***<br>[0.640, 0.833] | 0.730 ***<br>[0.640, 0.833] |
| Partner completed primary school                                                            | 0.995<br>[0.960, 1.031]     | 0.995<br>[0.960, 1.031]     | 0.996<br>[0.948, 1.047]     | 0.996<br>[0.948, 1.047]     |
| Partner completed secondary school                                                          | 0.940 ***<br>[0.899, 0.982] | 0.940 ***<br>[0.899, 0.982] | 0.939 **<br>[0.884, 0.997]  | 0.939 **<br>[0.884, 0.997]  |
| Partner completed tertiary level                                                            | 0.818 ***<br>[0.753, 0.888] | 0.817 ***<br>[0.752, 0.887] | 0.817 ***<br>[0.738, 0.904] | 0.817 ***<br>[0.738, 0.904] |
| Improved water source in household                                                          | 0.946<br>[0.875, 1.022]     | 0.950<br>[0.879, 1.027]     | 0.943<br>[0.846, 1.052]     | 0.944<br>[0.846, 1.053]     |
| Improved sanitation in household                                                            | 0.967 *<br>[0.934, 1.000]   | 0.966 **<br>[0.934, 0.999]  | 0.964<br>[0.921, 1.008]     | 0.964<br>[0.921, 1.008]     |
| Cooking with solid fuel                                                                     | 1.074 *<br>[0.990, 1.167]   | 1.073 *<br>[0.988, 1.166]   | 1.038<br>[0.944, 1.141]     | 1.037<br>[0.943, 1.140]     |

| <b>Outcome: Underweight</b>    | <b>(1)</b>                  | <b>(2)</b>                  | <b>(3)</b>                  | <b>(4)</b>                  |
|--------------------------------|-----------------------------|-----------------------------|-----------------------------|-----------------------------|
| Urban residence                | 1.025<br>[0.984, 1.068]     | 0.988<br>[0.920, 1.061]     | 1.027<br>[0.976, 1.081]     | 1.027<br>[0.976, 1.080]     |
| Wealth index quintile: poor    | 0.936 ***<br>[0.901, 0.972] | 0.937 ***<br>[0.902, 0.973] | 0.939 **<br>[0.887, 0.993]  | 0.939 **<br>[0.887, 0.993]  |
| Wealth index quintile: middle  | 0.866 ***<br>[0.828, 0.905] | 0.866 ***<br>[0.828, 0.906] | 0.871 ***<br>[0.819, 0.927] | 0.871 ***<br>[0.818, 0.926] |
| Wealth index quintile: rich    | 0.795 ***<br>[0.754, 0.840] | 0.795 ***<br>[0.753, 0.839] | 0.805 ***<br>[0.750, 0.864] | 0.805 ***<br>[0.750, 0.864] |
| Wealth index quintile: richest | 0.636 ***<br>[0.589, 0.687] | 0.636 ***<br>[0.589, 0.687] | 0.646 ***<br>[0.588, 0.710] | 0.646 ***<br>[0.588, 0.710] |
| Survey fixed effect: 2007 wave | 0.962<br>[0.916, 1.010]     | 0.962<br>[0.916, 1.010]     | 0.988<br>[0.930, 1.050]     | 0.989<br>[0.931, 1.051]     |
| Survey fixed effect: 2011 wave | 0.938 ***<br>[0.895, 0.982] | 0.937 ***<br>[0.895, 0.982] | 0.967<br>[0.913, 1.023]     | 0.968<br>[0.914, 1.025]     |
| Survey fixed effect: 2014 wave | 0.900 ***<br>[0.854, 0.948] | 0.900 ***<br>[0.854, 0.948] | 0.938 **<br>[0.882, 0.998]  | 0.941 *<br>[0.884, 1.001]   |
| Specification                  | District fixed<br>effects   | District fixed<br>effects   | District random<br>effects  | District random<br>effects  |
| N                              | 23,187                      | 23,187                      | 23,187                      | 23,187                      |

Values are estimated coefficient [95% confidence interval]. \*  $p < 0.10$ , \*\*  $p < 0.05$ , \*\*\*  $p < 0.01$ .



**Table S5.** The adjusted relative risk [95% confidence interval] of in utero PM<sub>2.5</sub> exposure on small birth size.

| Outcome: Small Birth Size                                                                   | (1)                         | (2)                         | (3)                         | (4)                         |
|---------------------------------------------------------------------------------------------|-----------------------------|-----------------------------|-----------------------------|-----------------------------|
| PM <sub>2.5</sub> exposure in utero, 40.3–45.8 µg/m <sup>3</sup>                            | 1.040<br>[0.879, 1.230]     | 1.006<br>[0.829, 1.221]     | 0.987<br>[0.845, 1.152]     | 0.998<br>[0.847, 1.174]     |
| PM <sub>2.5</sub> exposure in utero, 45.9–51.9 µg/m <sup>3</sup>                            | 1.100<br>[0.906, 1.335]     | 1.040<br>[0.844, 1.282]     | 1.058<br>[0.894, 1.251]     | 1.081<br>[0.890, 1.314]     |
| PM <sub>2.5</sub> exposure in utero, 52.0–72.9 µg/m <sup>3</sup>                            | 1.209 *<br>[0.965, 1.516]   | 1.249 *<br>[0.987, 1.580]   | 1.169 *<br>[0.979, 1.397]   | 1.212<br>[0.954, 1.539]     |
| PM <sub>2.5</sub> exposure in utero, 40.3–45.8 µg/m <sup>3</sup> *<br>Urban                 | -                           | 1.087<br>[0.831, 1.423]     | -                           | -                           |
| PM <sub>2.5</sub> exposure in utero, 45.9–51.9 µg/m <sup>3</sup> *<br>Urban                 | -                           | 1.175<br>[0.907, 1.521]     | -                           | -                           |
| PM <sub>2.5</sub> exposure in utero, 52.0–72.9 µg/m <sup>3</sup> *<br>Urban                 | -                           | 0.799*<br>[0.613, 1.042]    | -                           | -                           |
| Geometric average PM <sub>2.5</sub> level in district in<br>birth year (µg/m <sup>3</sup> ) | -                           | -                           | -                           | 0.998<br>[0.987, 1.008]     |
| Twin or triplet                                                                             | 2.205 ***<br>[1.720, 2.827] | 2.215 ***<br>[1.725, 2.842] | 2.230 ***<br>[1.736, 2.864] | 2.233 ***<br>[1.739, 2.868] |
| Female                                                                                      | 1.188 ***<br>[1.105, 1.278] | 1.189 ***<br>[1.106, 1.279] | 1.190 ***<br>[1.093, 1.295] | 1.190 ***<br>[1.093, 1.295] |
| First child                                                                                 | 1.171 ***<br>[1.048, 1.309] | 1.172 ***<br>[1.049, 1.310] | 1.175 **<br>[1.038, 1.330]  | 1.175 **<br>[1.038, 1.329]  |
| Birth interval < 12 months                                                                  | 0.904<br>[0.481, 1.699]     | 0.897<br>[0.478, 1.684]     | 0.854<br>[0.425, 1.716]     | 0.852<br>[0.424, 1.712]     |
| Birth interval 12–23 months                                                                 | 1.015<br>[0.867, 1.188]     | 1.016<br>[0.868, 1.190]     | 1.033<br>[0.872, 1.224]     | 1.032<br>[0.871, 1.223]     |
| Maternal height < 160 cm                                                                    | 1.215 *<br>[0.986, 1.498]   | 1.221 *<br>[0.991, 1.505]   | 1.228 *<br>[0.978, 1.542]   | 1.228 *<br>[0.978, 1.542]   |
| Maternal body mass index < 18.5 kg/m <sup>2</sup>                                           | 1.109 **<br>[1.018, 1.209]  | 1.109 **<br>[1.017, 1.209]  | 1.115 **<br>[1.014, 1.225]  | 1.114 **<br>[1.013, 1.225]  |
| Age of mother at birth < 18 years                                                           | 1.164 **<br>[1.020, 1.329]  | 1.165 **<br>[1.021, 1.330]  | 1.153 *<br>[0.997, 1.333]   | 1.153 *<br>[0.997, 1.333]   |
| Age of mother at birth 18–19 years                                                          | 0.946<br>[0.829, 1.080]     | 0.948<br>[0.831, 1.083]     | 0.938<br>[0.813, 1.082]     | 0.938<br>[0.814, 1.083]     |
| Mother completed primary school                                                             | 0.902 *<br>[0.803, 1.012]   | 0.899 *<br>[0.801, 1.009]   | 0.899 *<br>[0.795, 1.017]   | 0.899 *<br>[0.795, 1.017]   |
| Mother completed secondary school                                                           | 0.835 ***<br>[0.729, 0.956] | 0.835 ***<br>[0.729, 0.956] | 0.834 **<br>[0.726, 0.958]  | 0.834 **<br>[0.726, 0.958]  |
| Mother completed tertiary level                                                             | 0.661 ***<br>[0.520, 0.839] | 0.663 ***<br>[0.521, 0.842] | 0.651 ***<br>[0.505, 0.838] | 0.651 ***<br>[0.505, 0.838] |
| Partner completed primary school                                                            | 0.941<br>[0.847, 1.047]     | 0.942<br>[0.848, 1.048]     | 0.946<br>[0.844, 1.061]     | 0.946<br>[0.844, 1.061]     |
| Partner completed secondary school                                                          | 0.888 *<br>[0.784, 1.006]   | 0.892 *<br>[0.788, 1.010]   | 0.887 *<br>[0.776, 1.014]   | 0.887 *<br>[0.776, 1.014]   |
| Partner completed tertiary level                                                            | 0.877<br>[0.725, 1.061]     | 0.879<br>[0.727, 1.063]     | 0.872<br>[0.714, 1.066]     | 0.872<br>[0.714, 1.065]     |
| Improved water source in household                                                          | 0.785 **<br>[0.623, 0.990]  | 0.783 **<br>[0.621, 0.988]  | 0.793 *<br>[0.610, 1.031]   | 0.792 *<br>[0.610, 1.030]   |
| Improved sanitation in household                                                            | 0.924 *<br>[0.843, 1.012]   | 0.922 *<br>[0.841, 1.010]   | 0.928<br>[0.841, 1.024]     | 0.928<br>[0.841, 1.024]     |
| Cooking with solid fuel                                                                     | 1.053<br>[0.877, 1.264]     | 1.032<br>[0.859, 1.241]     | 1.048<br>[0.872, 1.260]     | 1.048<br>[0.871, 1.259]     |
| Urban residence                                                                             | 1.102 *<br>[0.991, 1.225]   | 1.102<br>[0.896, 1.355]     | 1.075<br>[0.961, 1.202]     | 1.074<br>[0.960, 1.202]     |
| Wealth index quintile: poor                                                                 | 0.946<br>[0.838, 1.069]     | 0.947<br>[0.838, 1.070]     | 0.947<br>[0.833, 1.076]     | 0.947<br>[0.834, 1.077]     |
| Wealth index quintile: middle                                                               | 0.921<br>[0.806, 1.052]     | 0.925<br>[0.809, 1.057]     | 0.937<br>[0.815, 1.077]     | 0.937<br>[0.815, 1.077]     |

| <b>Outcome: Small Birth Size</b> | <b>(1)</b>                 | <b>(2)</b>                 | <b>(3)</b>                 | <b>(4)</b>                 |
|----------------------------------|----------------------------|----------------------------|----------------------------|----------------------------|
| Wealth index quintile: rich      | 0.853 **<br>[0.737, 0.987] | 0.849 **<br>[0.733, 0.983] | 0.871 *<br>[0.745, 1.020]  | 0.871 *<br>[0.745, 1.019]  |
| Wealth index quintile: richest   | 0.872<br>[0.720, 1.056]    | 0.868<br>[0.717, 1.052]    | 0.895<br>[0.733, 1.093]    | 0.895<br>[0.733, 1.093]    |
| Survey fixed effect: 2014 wave   | 1.118 **<br>[1.026, 1.218] | 1.115 **<br>[1.023, 1.214] | 1.118 **<br>[1.021, 1.224] | 1.123 **<br>[1.023, 1.233] |
| Specification                    | District fixed<br>effects  | District fixed<br>effects  | District random<br>effects | District random<br>effects |
| N                                | 11,870                     | 11,870                     | 11,870                     | 11,870                     |

Values are estimated coefficient [95% confidence interval]. \*  $p < 0.10$ , \*\*  $p < 0.05$ , \*\*\*  $p < 0.01$ .
